# Supplementary material
Source: PubMed Central journal article supplement (PMC6660643)
Supplement: NIHMS1034648-supplement-Sup_Mat.pdf [file NIHMS1034648-supplement-Sup_Mat.pdf]

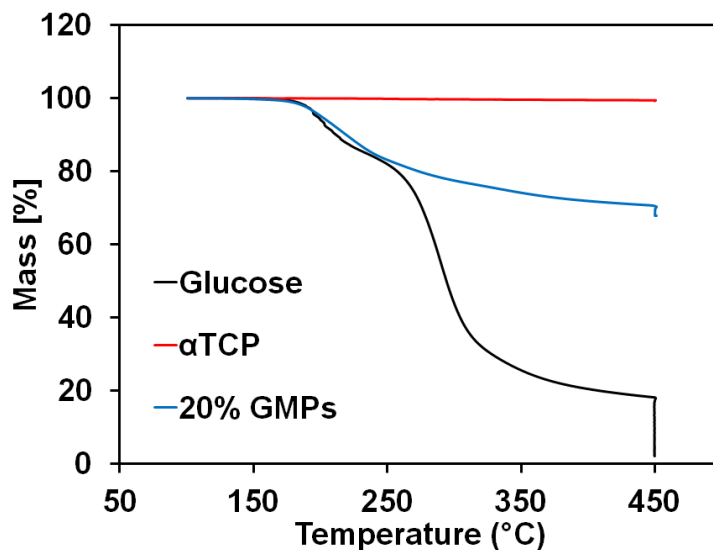

**Figure S1.** Representative thermogravimetric analysis (TGA) profiles of glucose,  $\alpha$ TCP, and 20 wt % 100-150  $\mu$ m GMPs with glucose-saturated aqueous  $\text{Na}_2\text{HPO}_4$  solution under an inert nitrogen atmosphere. Oxygen was introduced into the system at 450°C, at which point the residue carbon was subjected to combustion. The observed mass remaining of the 20% GMP group (67.3 %) is lower than expected due to the deposition of glucose from the glucose-saturated solution. Weight % data are normalized to the initial weight after the evaporation of water at 100°C.

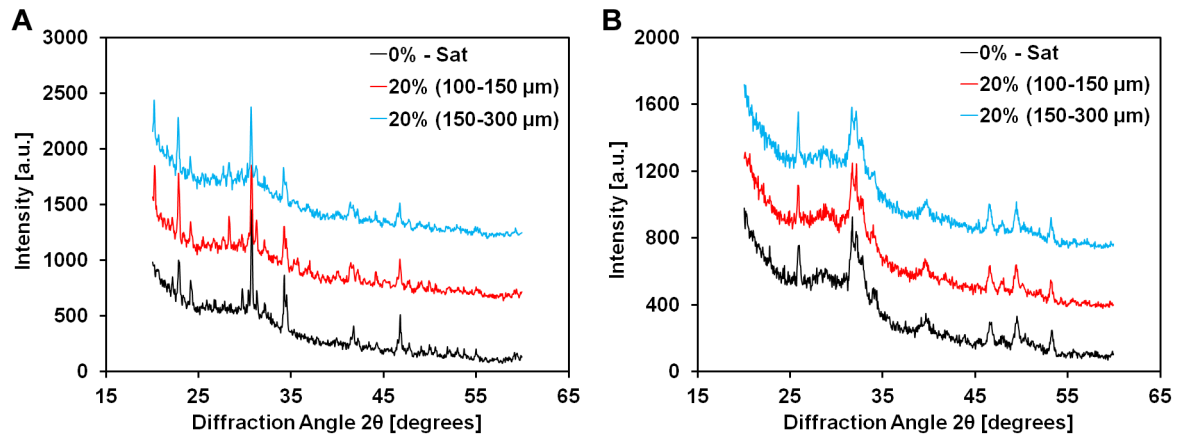

**Figure S2.** X-ray diffraction (XRD) patterns for different GMP/CPC formulations analyzed (A) pre leached and (B) post leached. Spectra reveal that all  $\alpha$ TCP transforms into HA as seen by the disappearance of the peak at a  $2\theta$  value of  $30^\circ$  and the emergence of two peaks at  $2\theta$  values of  $25.8^\circ$  and  $31.8^\circ$ .

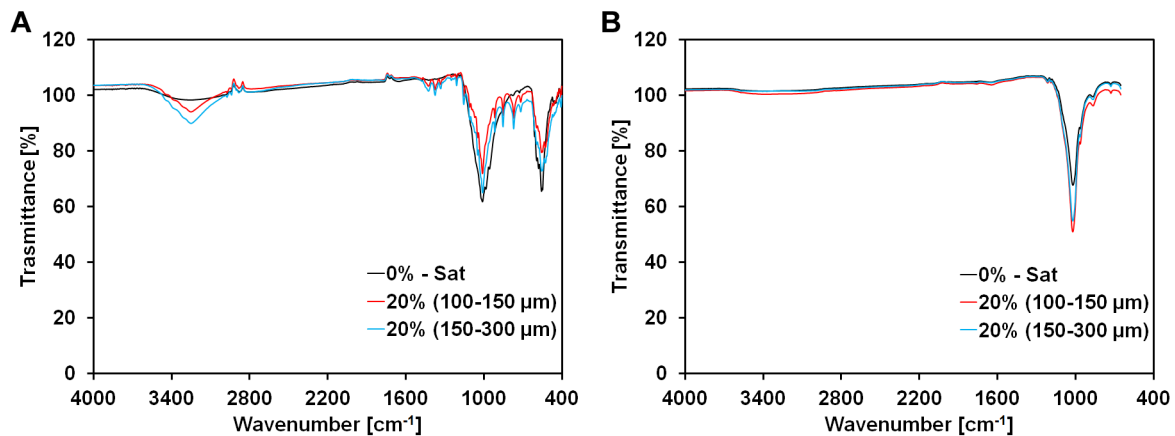

**Figure S3.** Fourier transform infrared spectroscopy (FTIR) patterns for different GMP/CPC formulations analyzed (A) pre leached and (B) post leached. Spectra show absorption bands characteristic for apatite at  $900\text{ cm}^{-1}$  while the disappearance of the C=O and O-H stretch at  $1500\text{ cm}^{-1}$  and  $3200\text{ cm}^{-1}$ , respectively, confirms the dissolution of glucose within 72 hrs.

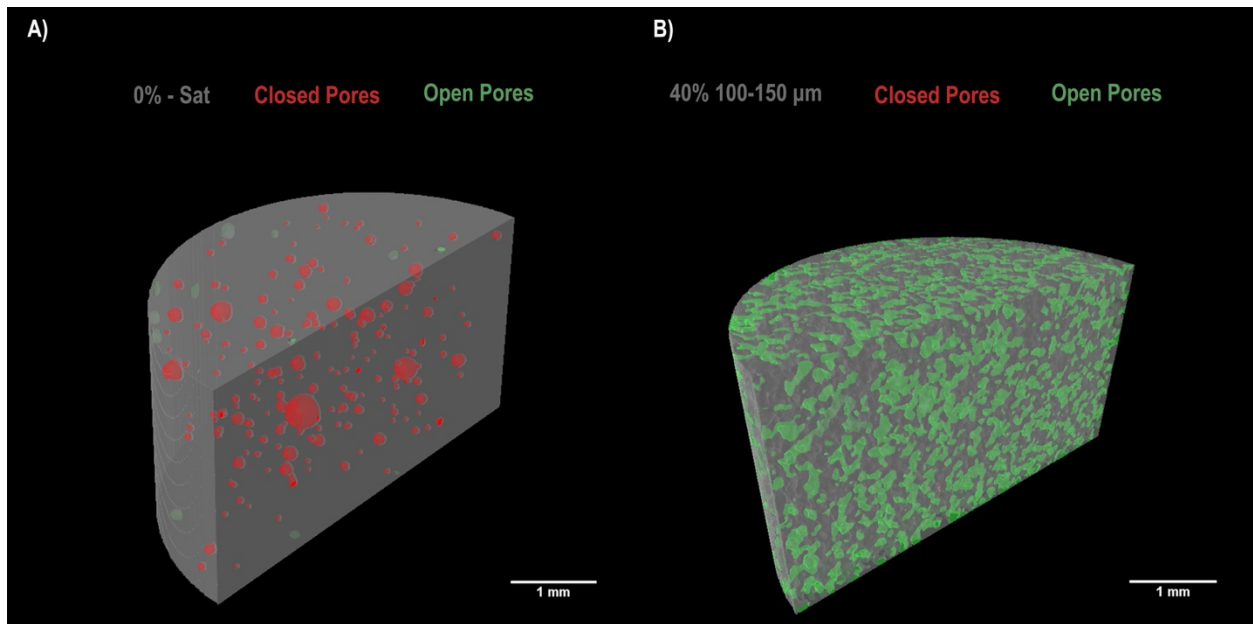

**Figure S4.** Representative  $\mu\text{CT}$  reconstructions of 0%- Sat (A) and 40% 100-150  $\mu\text{m}$  (B) GMP/CPC composites sectioned in half. Grey represents the bulk phase while red and green represent closed and open pores, respectively. Scale bar represents 1 mm.

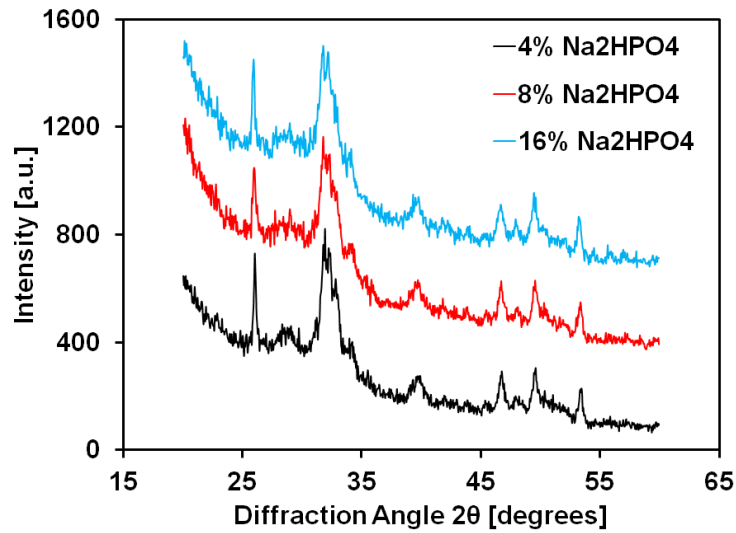

**Figure S5.** X-ray diffraction (XRD) patterns where the concentration of  $\text{Na}_2\text{HPO}_4$  was increased for 20% 100-150  $\mu\text{m}$  GMP/CPC composites. Samples were placed in PBS for 72 hours. Spectra reveal that increasing the concentration of  $\text{Na}_2\text{HPO}_4$  does not lead to crystallographic changes.

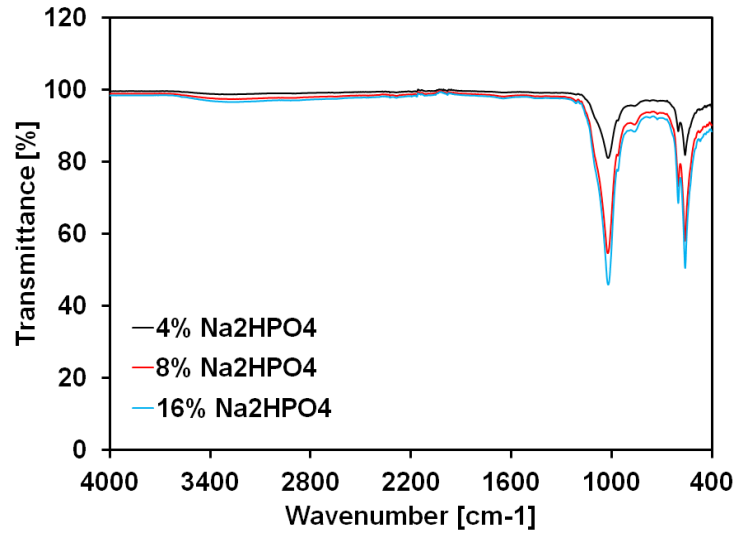

**Figure S6:** Fourier transform infrared spectroscopy (FTIR) patterns where the concentration of  $\text{Na}_2\text{HPO}_4$  was increased for 20% 100-150  $\mu\text{m}$  GMP/CPC composites. Samples were placed in PBS for 72 hours. Spectra reveal that increasing the concentration of  $\text{Na}_2\text{HPO}_4$  within the liquid phase does not influence the transition to hydroxyapatite.
